# Supplementary material for: Urinary sampling for 5HIAA and metanephrines determination: revisiting the recommendations
Source: PubMed Central journal article supplement — Endocr Connect. 2017 May 31;6(6):R87–98. doi: 10.1530/EC-17-0071 (PMC5527357; doi:10.1530/ec-17-0071), 2017-05-31
Supplement: ec-6-R87-s001.pdf [file ec-6-R87-s001.pdf]

## Supplemental data

Sites mentioning recommendations for amine collection in urine; accessed between the 21<sup>st</sup> and the 28<sup>th</sup> of January 2017.

[biomnis.com](http://biomnis.com)

[bioxa.fr](http://bioxa.fr)

[dynabio.fr](http://dynabio.fr)

[dynacare.fr](http://dynacare.fr)

[emedicine.medscape.com](http://emedicine.medscape.com)

[etd.paml.com](http://etd.paml.com)

[ltd.aruplab.com](http://ltd.aruplab.com)

[carcinoid.org](http://carcinoid.org)

[chumontreal.qc.ca](http://chumontreal.qc.ca)

[labtestsonline.org](http://labtestsonline.org)

[lab-cerba.com](http://lab-cerba.com)

[mayomedicallaboratories.com](http://mayomedicallaboratories.com)

[questdiagnostics.com](http://questdiagnostics.com)

[tdlpathology.com](http://tdlpathology.com)

[wardelab.com](http://wardelab.com)
